# Supplementary material
Source: HighWire-hosted journal article supplement (https://jnis.bmj.com/highwire/filestream/166421/field_highwire_adjunct_files/0/neurintsurg-2020-016994supp001_data_supplement.pdf)

## Supplemental Material

**Table S1. Background Characteristics**

Abbreviation; ASA: aspirin; CPG: clopidogrel; PSG: prasugrel; IQR: interquartile range

<sup>1</sup>Statistical tests performed: Wilcoxon rank-sum test for continuous variable; Fisher's exact test for sex, location and device

| Character       | Item                  | Total<br>(n=217)                 | Tailored group<br>(n=167) | sub-group                |                         | non-Tailored group<br>(n=50) | P-value <sup>1</sup> |            |
|-----------------|-----------------------|----------------------------------|---------------------------|--------------------------|-------------------------|------------------------------|----------------------|------------|
|                 |                       |                                  |                           | CPG sub-group<br>(n=140) | PSG sub-group<br>(n=27) |                              |                      |            |
| <b>age</b>      | mean ± SD             | 60.9 ± 12.3                      | 61.6±12.5                 | 62.0 ±12.4               | 59.3 ±13.2              | 58.4 ± 11.4                  | 0.068                |            |
|                 | median (IQR)          | 61.0 (51-70)                     | 63.0 (52-73)              | 64.0 (53-73)             | 61.0 (49-69)            | 57.5 (51-67)                 |                      |            |
| <b>sex</b>      | man                   | 71 (32.7%)                       | 55 (32.9%)                | 51 (36.4%)               | 4 (14.8%)               | 16 (32.0%)                   | >0.999               |            |
|                 | woman                 | 146 (67.3%)                      | 112 (67.1%)               | 89 (63.6%)               | 23 (85.2%)              | 34 (68.0%)                   |                      |            |
| <b>Location</b> | Anterior circulation  | ICA                              | 136 (62.7%)               | 107 (64.1%)              | 86 (61.4%)              | 21 (77.8%)                   | 29 (58.0%)           | 0.505      |
|                 |                       | ACA, Acom                        | 27 (12.4%)                | 20 (12.0%)               | 18 (12.9%)              | 2 (7.4%)                     | 7 (14.0%)            | 0.807      |
|                 |                       | MCA                              | 4 (1.8%)                  | 2 (1.2%)                 | 2 (1.4%)                | 0 (0%)                       | 2 (4.0%)             | 0.228      |
|                 | Posterior circulation | BA                               | 30 (13.8%)                | 23 (13.8%)               | 19 (13.6%)              | 4 (14.8%)                    | 7 (14.0%)            | >0.999     |
|                 |                       | VA                               | 21 (9.7%)                 | 16 (9.6%)                | 16 (11.4%)              | 0                            | 5 (10.0%)            | >0.999     |
| <b>Device</b>   | Coil embolization (C) | 66 (30.6%)                       | 47 (28.3%)                | 37 (26.6%)               | 10 (37.0%)              | 19 (38.0%)                   | 0.011                |            |
|                 | coil with stenting    | Coil with Stenting (S)           | 106 (49.1%)               | 80 (48.2%)               | 68 (48.9%)              | 12 (44.4%)                   |                      | 26 (52.0%) |
|                 |                       | Coil with multiple stenting (Sm) | 20 (9.3%)                 | 15 (9.0%)                | 13 (9.4%)               | 2 (7.4%)                     |                      | 5 (10.0%)  |
|                 | Flow Diverter (FD)    | 24 (11.1%)                       | 24 (14.5%)                | 21 (15.1%)               | 3 (11.1%)               | 0                            |                      |            |

**Table S2. DWI grading**

Abbreviation; ASA: aspirin; CPG: clopidogrel; PSG: prasugrel

| The DWI grade     | Total (n=217) | Tailored group (n=167) | sub-group CPG sub-group (n=140) | PSG sub-group (n=27) | Symptomatic lesion | non-Tailored group (n=50) | Symptomatic lesion |
|-------------------|---------------|------------------------|---------------------------------|----------------------|--------------------|---------------------------|--------------------|
| A (no HIA)        | 44 (20%)      | 35 (20%)               | 33 (24%)                        | 2 (7%)               | 1                  | 9 (18%)                   | 0                  |
| B (1-4 small HIA) | 71 (33%)      | 60 (36%)               | 44 (31%)                        | 16 (59%)             | 0                  | 11 (22%)                  | 0                  |
| C (>5 small HIA)  | 78 (36%)      | 55 (33%)               | 48 (34%)                        | 7 (25%)              | 1                  | 23 (46%)                  | 4                  |
| D (any large HIA) | 22 (10%)      | 16 (9%)                | 14 (10%)                        | 2 (7%)               | 5                  | 6 (12%)                   | 3                  |
| E (not examined)  | 2 (1%)        | 1 (1%)                 | 1 (1%)                          | 0 (0%)               | -                  | 1 (2%)                    | -                  |

Figure S1. DWI grading

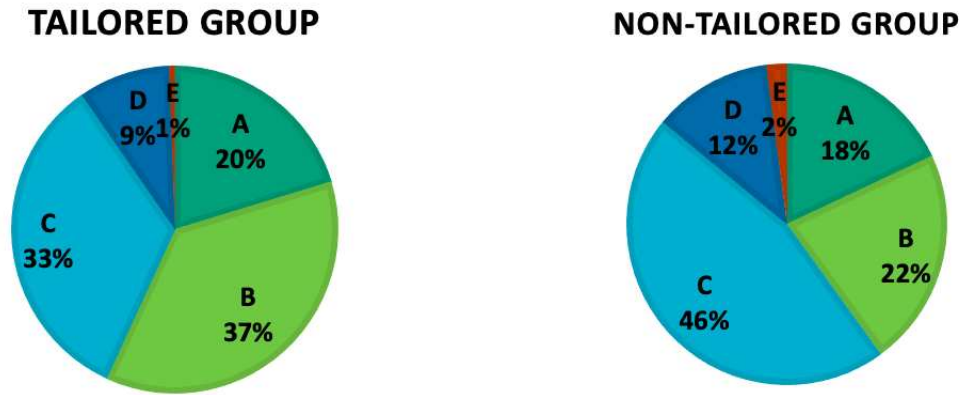

**Figure S2. DWI grading**

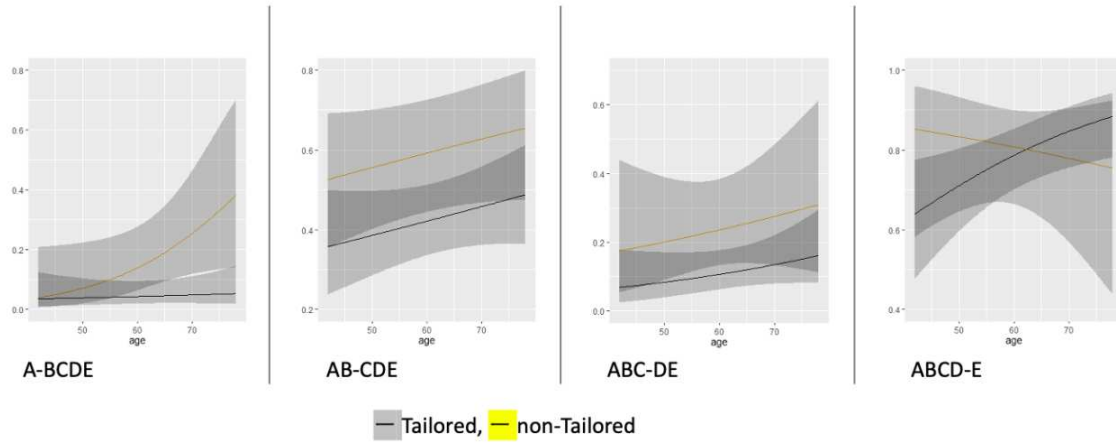

**Figure S3. PRU cut-off in terms of TECs**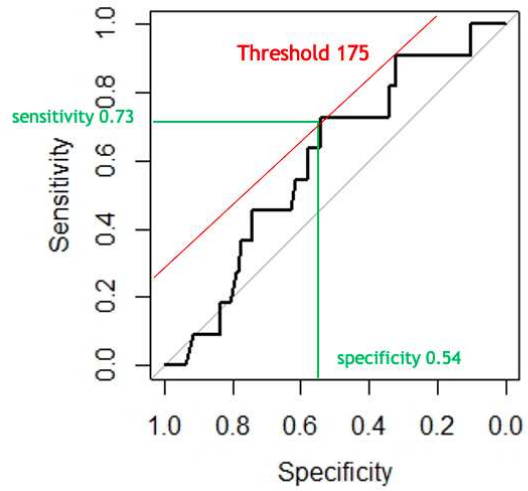

Supplement: neurintsurg-2020-016994supp001_data_supplement.pdf [file neurintsurg-2020-016994supp001_data_supplement.pdf]
